# Supplementary material for: Variation in the phenotypic performance of top-cross fall armyworm resistant maize hybrids under optimal growing conditions in a derived savanna agro-ecology
Source: Research Square preprint supplement (doi:10.21203/rs.3.rs-8279943/v1), 2026-01-09
Supplement: Supplementary file 1 [file 7c91deaf9b8e9701cc47f565.docx]

Supplementary Table 1: Combined performance of top-cross FAWR maize hybrids and checks based on the mean values for all traits across environments

| HYBRID | DP  (days) | DS  (days) | ASI  (days) | PH  (cm) | EH  (cm) | HC  (1-5) | PASP  (1-5) | EASP  (1-5) | ER  (1-5) | EPP | Y  (kg/ha) | MSV  (1-5) | SCLR  (1-5) | SCLB  (1-5) | CLS  (1-5) | FAW4  (1-9) | FAW8  (1-9) | FAW12  (1-9) |
| --- | --- | --- | --- | --- | --- | --- | --- | --- | --- | --- | --- | --- | --- | --- | --- | --- | --- | --- |
| FAWSYN-1/(TZLComp. 1 C6-W-39-1-1)-B-B | 55.49 | 58.94 | 3.45 | 153.37 | 69.39 | 3.06 | 2.91 | 2.47 | 2.48 | 0.93 | 5223.25 | 0.75 | 2.30 | 2.37 | 6.02 | 2.92 | 2.07 | 2.00 |
| FAWSYN-1/TZISTR1869 | 54.24 | 57.14 | 2.90 | 143.80 | 58.94 | 3.37 | 3.39 | 3.02 | 2.02 | 0.89 | 3508.48 | 0.74 | 1.51 | 2.60 | 5.25 | 2.75 | 2.54 | 2.53 |
| FAWSYN-1/TZISTR1878 | 56.57 | 60.21 | 3.64 | 143.02 | 65.66 | 2.65 | 2.83 | 2.68 | 2.06 | 0.87 | 3905.89 | 2.03 | 0.36 | 4.04 | 4.60 | 3.76 | 1.84 | 1.86 |
| FAWSYN-1/TZISTR1121 | 54.50 | 58.63 | 4.13 | 134.93 | 54.94 | 3.26 | 2.92 | 2.65 | 3.12 | 0.95 | 3798.48 | 2.06 | 1.51 | 2.32 | 4.97 | 3.20 | 2.37 | 2.32 |
| FAWSYN-1/TZISTR1129 | 56.79 | 60.01 | 3.23 | 133.10 | 56.25 | 3.16 | 3.51 | 2.63 | 2.43 | 0.61 | 2463.53 | 1.86 | 1.57 | 2.35 | 5.10 | 3.48 | 2.61 | 2.55 |
| FAWSYN-1/TZISTR2024 | 56.95 | 60.51 | 3.55 | 139.87 | 55.56 | 3.39 | 3.31 | 2.90 | 3.04 | 0.86 | 3052.67 | 1.40 | 1.43 | 0.76 | 4.30 | 2.76 | 1.85 | 1.89 |
| FAWSYN-1/TZISTR1305 | 55.78 | 58.91 | 3.13 | 135.46 | 61.01 | 3.24 | 3.49 | 2.52 | 1.89 | 0.72 | 3134.51 | 1.68 | 1.11 | 2.82 | 3.97 | 2.67 | 1.55 | 1.54 |
| FAWSYN-1/TZISTR2042 | 56.50 | 60.24 | 3.74 | 135.69 | 62.67 | 2.55 | 3.22 | 2.72 | 2.27 | 0.86 | 2658.07 | 0.98 | 1.88 | 1.98 | 2.84 | 3.04 | 1.69 | 1.70 |
| FAWSYN-2/(TZLComp. 1 C6-W-39-1-1)-B-B | 55.06 | 58.19 | 3.13 | 148.55 | 64.61 | 2.98 | 3.09 | 2.64 | 2.21 | 0.86 | 4910.48 | 1.17 | 2.24 | 2.34 | 5.64 | 2.77 | 1.67 | 1.56 |
| FAWSYN-2/TZISTR1878 | 56.56 | 60.10 | 3.54 | 148.06 | 68.56 | 2.95 | 2.63 | 2.64 | 2.09 | 0.90 | 3318.52 | 2.23 | 1.29 | 3.18 | 4.04 | 3.94 | 1.61 | 1.70 |
| FAWSYN-2/TZISTR1129 | 56.98 | 60.58 | 3.61 | 126.36 | 55.84 | 2.55 | 2.98 | 2.46 | 1.91 | 0.88 | 2893.47 | 1.68 | 1.05 | 2.49 | 4.60 | 3.49 | 1.77 | 1.77 |
| FAWSYN-2/TZISTR2024 | 56.51 | 59.43 | 2.92 | 155.90 | 67.37 | 3.12 | 3.20 | 2.96 | 2.76 | 0.84 | 3664.03 | 0.73 | 2.08 | 1.79 | 11.04 | 3.89 | 2.09 | 2.08 |
| FAWSYN-2/TZISTR1305 | 56.29 | 59.99 | 3.69 | 130.02 | 48.51 | 2.99 | 2.85 | 2.84 | 2.19 | 0.75 | 3007.00 | 2.58 | 1.93 | 2.92 | 4.96 | 3.05 | 2.44 | 2.11 |
| FAWSYN-2/TZISTR2129-2 | 55.59 | 59.47 | 3.89 | 130.49 | 64.96 | 2.86 | 2.82 | 3.03 | 2.69 | 0.91 | 3223.10 | 1.60 | 1.64 | 3.59 | 4.59 | 3.10 | 1.58 | 1.59 |
| FAWSYN-3/TZISTR1869 | 53.34 | 55.84 | 2.50 | 136.95 | 59.03 | 2.93 | 3.41 | 3.02 | 2.88 | 0.90 | 3660.48 | 0.96 | 1.53 | 2.88 | 4.32 | 3.54 | 1.54 | 1.48 |
| FAWSYN-3/TZISTR1872 | 54.76 | 58.60 | 3.84 | 140.23 | 55.93 | 3.01 | 3.14 | 3.11 | 1.96 | 0.82 | 3572.97 | 1.23 | 1.76 | 2.72 | 5.64 | 2.37 | 2.61 | 2.58 |
| FAWSYN-3/TZISTR1878 | 57.40 | 60.70 | 3.30 | 144.80 | 64.43 | 2.97 | 3.43 | 3.01 | 2.50 | 0.74 | 4031.50 | 1.92 | 1.49 | 3.74 | 4.49 | 3.53 | 1.76 | 1.84 |
| FAWSYN-3/IITATZI2300 | 54.13 | 57.73 | 3.61 | 143.37 | 59.49 | 2.59 | 2.56 | 3.21 | 2.65 | 1.08 | 4204.88 | 1.17 | 1.94 | 2.88 | 2.88 | 2.66 | 1.64 | 1.64 |
| FAWSYN-3/IITATZI2305 | 55.17 | 58.21 | 3.04 | 135.67 | 58.30 | 2.92 | 2.95 | 2.66 | 2.70 | 0.84 | 3751.35 | 1.78 | 1.77 | 3.34 | 5.46 | 2.72 | 1.55 | 1.48 |
| FAWSYN-1/IITATZI2300 | 55.02 | 58.80 | 3.77 | 159.32 | 61.90 | 2.55 | 2.69 | 3.13 | 2.69 | 0.87 | 4032.32 | 1.66 | 2.52 | 3.06 | 5.76 | 3.31 | 1.85 | 1.83 |
| FAWSYN-2/IITATZI2300 | 55.44 | 58.58 | 3.13 | 147.98 | 57.56 | 2.67 | 2.91 | 2.45 | 2.26 | 0.82 | 4360.75 | 1.31 | 2.01 | 2.63 | 2.62 | 3.00 | 1.67 | 1.72 |
| FAWSYN-1/IITATZI2305 | 57.51 | 60.85 | 3.33 | 137.02 | 56.76 | 3.04 | 3.02 | 2.94 | 2.32 | 0.95 | 3850.97 | 1.57 | 2.26 | 4.84 | 3.82 | 2.54 | 1.78 | 1.79 |
| FAWSYN-2/IITATZI2305 | 56.11 | 59.32 | 3.21 | 127.58 | 56.19 | 3.24 | 2.90 | 2.85 | 2.90 | 0.83 | 3504.18 | 2.73 | 1.48 | 3.86 | 4.62 | 3.31 | 1.85 | 1.86 |
| FAWSYN-1 | 55.64 | 59.78 | 4.14 | 128.51 | 55.22 | 3.11 | 3.39 | 2.56 | 2.10 | 0.56 | 2039.92 | 1.57 | 2.23 | 1.13 | 3.87 | 2.77 | 1.88 | 1.98 |
| FAWSYN-2 | 56.92 | 60.46 | 3.55 | 130.92 | 55.35 | 2.69 | 3.10 | 3.13 | 2.91 | 0.96 | 3044.38 | 1.36 | 1.83 | 2.33 | 4.01 | 2.76 | 1.93 | 1.91 |
| FAWSYN-3 | 55.54 | 59.35 | 3.82 | 131.36 | 54.83 | 3.59 | 3.89 | 2.85 | 2.82 | 0.80 | 2880.43 | 1.72 | 1.31 | 1.59 | 4.62 | 3.79 | 2.36 | 2.03 |
| SAMMAZ 51 | 56.15 | 58.57 | 2.43 | 140.53 | 56.31 | 2.83 | 3.27 | 2.82 | 1.82 | 0.81 | 3305.07 | 1.11 | 1.36 | 2.97 | 3.69 | 4.07 | 1.56 | 1.66 |
| CHECK |  |  |  |  |  |  |  |  |  |  |  |  |  |  |  |  |  |  |
| Oba Super 11 | 54.92 | 58.61 | 3.69 | 132.53 | 47.62 | 3.64 | 4.12 | 3.19 | 2.34 | 0.97 | 1672.94 | 1.11 | 1.15 | 1.82 | 2.69 | 3.73 | 2.30 | 2.29 |
| SC301 | 50.20 | 53.29 | 3.09 | 155.59 | 61.45 | 3.38 | 3.27 | 3.42 | 3.63 | 0.79 | 3067.79 | 1.87 | 2.25 | 3.51 | 5.78 | 4.49 | 2.15 | 2.16 |
| Oba Super 7 | 55.99 | 58.24 | 2.25 | 144.52 | 59.27 | 2.98 | 3.24 | 2.71 | 2.10 | 0.94 | 3083.54 | 0.83 | 0.92 | 3.32 | 4.51 | 4.32 | 1.78 | 1.75 |
| Oba Super 9 | 55.12 | 58.07 | 2.94 | 133.26 | 64.02 | 3.00 | 3.08 | 3.30 | 3.34 | 0.92 | 3823.66 | 0.95 | 2.79 | 3.61 | 4.62 | 3.95 | 2.95 | 2.95 |
| Oba Super 2 | 54.66 | 57.97 | 3.31 | 125.00 | 47.21 | 3.88 | 4.03 | 2.82 | 2.76 | 0.88 | 1502.74 | 1.69 | 1.15 | 1.88 | 2.54 | 4.64 | 2.18 | 2.18 |
|  |  |  |  |  |  |  |  |  |  |  |  |  |  |  |  |  |  |  |
| STATISTICS |  |  |  |  |  |  |  |  |  |  |  |  |  |  |  |  |  |  |
| HSD (0.05) | 3.30 | 3.15 | 3.71 | 31.07 | 19.11 | 0.93 | 1.07 | 1.10 | 1.47 | 0.34 | 1949.30 | 1.98 | 1.47 | 2.04 | 6.51 | 1.68 | 0.82 | 0.79 |
| Mean | 55.56 | 58.92 | 3.36 | 139.18 | 58.91 | 3.04 | 3.17 | 2.85 | 2.50 | 0.85 | 3379.73 | 1.50 | 1.68 | 2.74 | 4.62 | 3.32 | 1.97 | 1.95 |
| Standard Error | 0.25 | 0.27 | 0.08 | 1.62 | 0.99 | 0.06 | 0.07 | 0.05 | 0.08 | 0.02 | 142.66 | 0.09 | 0.09 | 0.15 | 0.27 | 0.11 | 0.07 | 0.06 |
| Standard Deviation | 1.40 | 1.53 | 0.46 | 9.16 | 5.59 | 0.33 | 0.37 | 0.26 | 0.45 | 0.10 | 807.00 | 0.52 | 0.52 | 0.87 | 1.51 | 0.60 | 0.38 | 0.35 |
| Range | 7.31 | 7.56 | 1.89 | 34.32 | 22.18 | 1.33 | 1.56 | 0.97 | 1.81 | 0.52 | 3720.51 | 2.00 | 2.43 | 4.08 | 8.50 | 2.27 | 1.41 | 1.47 |
| Minimum | 50.20 | 53.29 | 2.25 | 125.00 | 47.21 | 2.55 | 2.56 | 2.45 | 1.82 | 0.56 | 1502.74 | 0.73 | 0.36 | 0.76 | 2.54 | 2.37 | 1.54 | 1.48 |
| Maximum | 57.51 | 60.85 | 4.14 | 159.32 | 69.39 | 3.88 | 4.12 | 3.42 | 3.63 | 1.08 | 5223.25 | 2.73 | 2.79 | 4.84 | 11.04 | 4.64 | 2.95 | 2.95 |

DP = number of days to anthesis, DS = number of days to silking, ASI = anthesis-silking interval, PH = plant height, EH = ear height, HC = husk cover, PASP = plant aspect, EASP = ear aspect, ER = ear rot, EPP = number of ears per plant, Y = grain yield, MSV = maize streak virus, SCLR = Southern corn leaf blight, SCLB = Southern corn leaf rust, CLS = *Curvularia* leaf spot, FAW4 = foliar FAW damage at 4 weeks, FAW8 = foliar FAW damage at 8 weeks, FAW12 = foliar FAW damage at 12 weeks.
